# Supplementary material
Source: PubMed Central journal article supplement (PMC3092152)
Supplement: NIHMS262382-supplement-supplement_1.pdf [file NIHMS262382-supplement-supplement_1.pdf]

680 Figure S1 Genetic relationships between the 74 *S. mutans* amplitypes from 60 subjects.

681 Figure S2 Genetic relationships between 27 *S. mutans* amplitypes from subjects who harbored  
682 more than 1 distinct *S. mutans* amplitype.

683 Figure S3 Susceptibility of *S. mutans* in caries-active versus caries-free subjects: analysis of all  
684 strains from subjects. (A) HNP-1; (B) HNP-2; (C) HNP-3; (D) HBD-2; (E) HBD-3; (F) LL-37.

685 Figure S4 Effect of AMP combinations. Isobolograms of each peptide combination are shown.  
686 (A) HNP-1 and HNP-2; (B) HNP-1 and HNP-3; (C) HNP-2 and HNP-3; (D) HNP-1 and HBD-2;  
687 (E) HNP-1 and HBD-3; (F) HNP-2 and HBD-2; (G) HNP-2 and HBD-3; (H) HNP-3 and HBD-  
688 2; (I) HNP-3 and HBD-3; (J) HNP-1 and LL-37; (K) HNP-2 and LL-37; (L) HNP-3 and LL-37;  
689 (M) HBD-2 and HBD-3; (N) HBD-2 and LL-37 and (O) HBD-3 and LL-37. Dotted line,  
690 expected result for additive interaction. Experiments were repeated two times with similar  
691 results. Results shown are from a representative experiment.

692 Fig. S5 Relationships between the salivary AMP levels. Only significant correlations are shown.  
693 (A) HNP-1-3 and LL-37; (B) HNP-1-3 relative to total protein and LL-37 relative to total  
694 protein; (C) HBD-2 and HBD-3; (D) HBD-2 relative to total protein and HBD-3 relative to total  
695 protein; (E) HNP-1-3 and HBD-2; (F) LL-37 relative to total protein and HBD-3 relative to total  
696 protein

697 Figure S6 Relationship between levels of HNP-1-3 in saliva and MS count in dental plaque  
698 (p=0.03).

699 Fig. S7 Relationship between levels of HNP-1-3 in saliva and the susceptibility profiles of *S.*  
700 *mutans* to HNP-1 (p=0.04).

701 Table S1 Correlations between pairs of susceptibility profiles of *S. mutans* to different peptides.

| Susceptibility to the peptide pair | Correlation coefficients | P-values |
|------------------------------------|--------------------------|----------|
|------------------------------------|--------------------------|----------|

|                 |       |          |
|-----------------|-------|----------|
| HNP-1 and HNP-2 | 0.94  | <0.0001* |
| HNP-1 and HNP-3 | 0.69  | <0.0001* |
| HNP-2 and HNP-3 | 0.78  | <0.0001* |
| HNP-1 and HBD-2 | 0.01  | 0.9005   |
| HNP-1 and HBD-3 | -0.09 | 0.4702   |
| HNP-1 and LL-37 | 0.18  | 0.165    |
| HNP-2 and HBD-2 | -0.01 | 0.9653   |
| HNP-2 and HBD-3 | -0.01 | 0.9193   |
| HNP-2 and LL-37 | 0.15  | 0.2687   |
| HNP-3 and HBD-2 | 0.05  | 0.6958   |
| HNP-3 and HBD-3 | -0.01 | 0.9754   |
| HNP-3 and LL-37 | 0.07  | 0.5861   |
| HBD-2 and HBD-3 | 0.56  | <0.0001* |
| HBD-2 and LL-37 | 0.6   | <0.0001* |
| HBD-3 and LL-37 | 0.53  | <0.0001* |

702

703 [Figure legends]

704 **Fig. 1 Susceptibility of *S. mutans* from caries-active versus caries-free subjects: analysis of**

705 **predominant strains from subjects. (A) HNP-1; (B) HNP-2; (C) HNP-3; (D) HBD-2; (E)**

706 **HBD-3; (F) LL-37. White bars represent caries-free subjects. Black bars represent caries-active**

707 **subjects. Asterisks indicate statistically significant differences in viabilities between both groups**

708 **(p<0.05).**

709

710 .
